# Supplementary material for: Synthesis and analysis of the anticancer activity of Ru(ii) complexes incorporating 2-hydroxymethylidene-indene-1,3-dione ligands
Source: Royal Society of Chemistry journal article supplement (doi:10.1039/c7nj02162c), 2017-01-01

## Synthesis and Analysis of the Anticancer Activity of Ru(II) Complexes

### Incorporating 2-Hydroxymethylidene-indene-1,3-diones Ligands

E. Tsovaltzi,<sup>a</sup> E. Malamidou-Xenikaki,<sup>\*,a</sup> P. Dalezis,<sup>b</sup> A. Hatzidimitriou,<sup>a</sup> T. Lazarides,<sup>a</sup> D. Trafalis<sup>\*,b</sup> V. Sarli<sup>\*,a</sup>

<sup>a</sup> Dr. V. Sarli, Dr. E. Malamidou-Xenikaki, E. Tsovaltzi, T. Lazarides, Department of Chemistry, Aristotle University of Thessaloniki, University Campus, 54124, Thessaloniki, Greece, E-mail: [sarli@chem.auth.gr](mailto:sarli@chem.auth.gr), [malamido@chem.auth.gr](mailto:malamido@chem.auth.gr)

<sup>b</sup> Dr. D. Trafalis, Dr. P. Dalezis, Laboratory of Pharmacology, Medical School National and Kapodistrian University of Athens 75 Mikras Asias Street, Athens, 11527, Greece E-mail: [dtrafal@med.uoa.gr](mailto:dtrafal@med.uoa.gr)

### Supporting Information

|                                                        |      |
|--------------------------------------------------------|------|
| Cell lines                                             | 2    |
| Biological assays                                      | 2    |
| Crystallographic and refinement details                | 4    |
| <sup>1</sup> H-NMR, <sup>13</sup> C-NMR and MS spectra | 5-13 |

**Table S1.** Human ovarian cancer cell lines to be used for the *in vitro* analysis of the compounds biological activity

| Cancer Type                       | Human Cell line designation | Oncogenes        | Special Characteristics                                                        |
|-----------------------------------|-----------------------------|------------------|--------------------------------------------------------------------------------|
| Ovarian Adenocarcinoma            | SK-OV-3 (SKOV-3)            |                  | Tumor Necrosis Factor; Diphtheria Toxin; Cis-platinum and Adriamycin resistant |
| Epithelial Ovarian Adenocarcinoma | NIH:OVCAR-5                 |                  | Cisplatin resistant                                                            |
| Ovarian Carcinoma                 | UWB1.289                    | p53 +<br>BRCA1 - | Estrogen/Progesterone receptor negative                                        |
| Ovarian Carcinoma                 | UWB1.289+BRCA1              | p53 +<br>BRCA1 + | Estrogen/Progesterone receptor negative                                        |

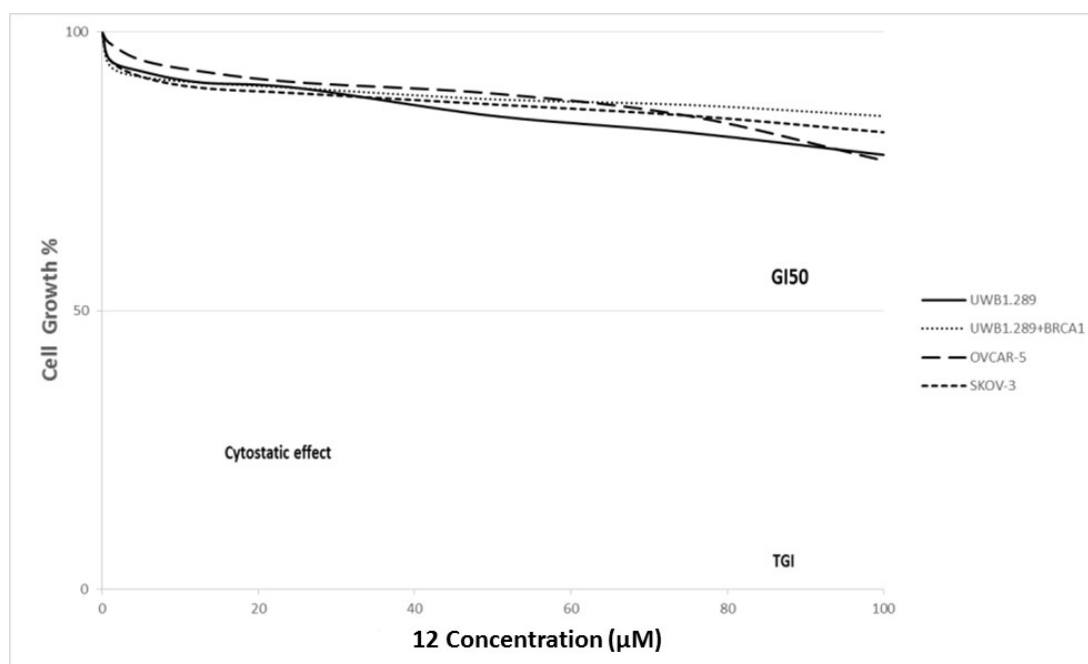

**Figure S1**

**Table S2.** Growth inhibition/cytostatic ( $GI_{50}$  and TGI  $\mu M$ ) and cytocidal/cytotoxic ( $IC_{50}$   $\mu M$ ) anticancer effects induced by **12** on OVCAR-5, SKOV-3, UWB1.289 and UWB1.289+BRCA1 human cancer ovarian cell lines

| Human ovarian cancer cell | 12        |      |           |
|---------------------------|-----------|------|-----------|
|                           | $GI_{50}$ | TGI  | $IC_{50}$ |
| OVCAR-5                   | >100      | >100 | >100      |
| SKOV-3                    | >100      | >100 | >100      |
| UWB1.289                  | >100      | >100 | >100      |
| UWB1.289+BRCA1            | >100      | >100 | >100      |

**Figure S2.** Growth inhibition/cytostatic ( $GI_{50}$  and TGI  $\mu M$ ) and cytocidal/cytotoxic ( $IC_{50}$   $\mu M$ ) anticancer effects induced by **cisplatin** on SKOV-3, and UWB1.289+BRCA1 human cancer ovarian cell lines

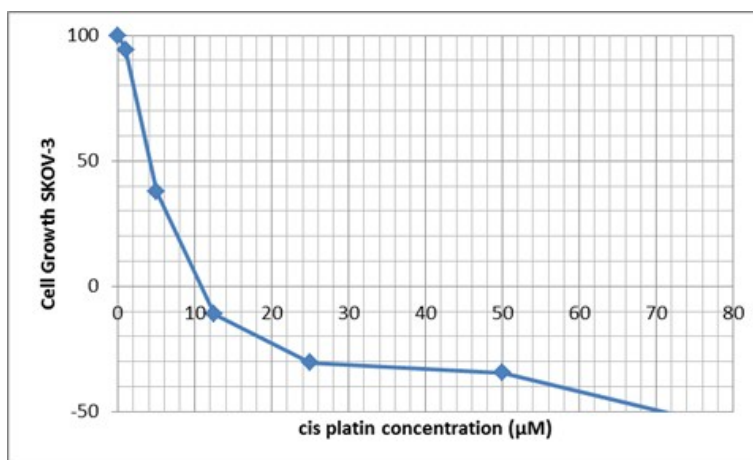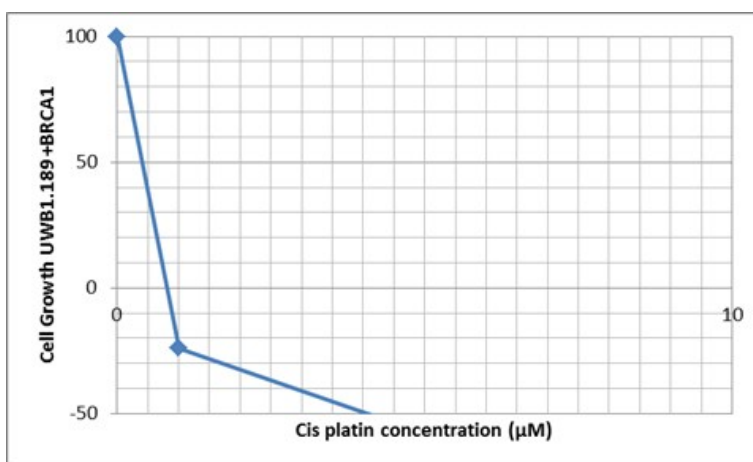

**Table S3.** Crystallographic and refinement details.

| Structure                                                        | <b>11a</b>                                          | <b>11c</b>                                          | <b>11d·0.25(CH<sub>2</sub>Cl<sub>2</sub>)</b>                                   | <b>13a·0.5(CH<sub>2</sub>Cl<sub>2</sub>)</b>                                                  |
|------------------------------------------------------------------|-----------------------------------------------------|-----------------------------------------------------|---------------------------------------------------------------------------------|-----------------------------------------------------------------------------------------------|
| Formula                                                          | C <sub>26</sub> H <sub>29</sub> ClO <sub>4</sub> Ru | C <sub>24</sub> H <sub>25</sub> ClO <sub>4</sub> Ru | C <sub>97</sub> H <sub>94</sub> Cl <sub>6</sub> O <sub>16</sub> Ru <sub>4</sub> | C <sub>59</sub> H <sub>54</sub> Cl <sub>4</sub> N <sub>2</sub> O <sub>6</sub> Ru <sub>2</sub> |
| Fw                                                               | 542.04                                              | 513.98                                              | 2132.80                                                                         | 1231.04                                                                                       |
| T (K)                                                            | 295(2)                                              | 295(2)                                              | 295(2)                                                                          | 295(2)                                                                                        |
| λ (Å)                                                            | 0.71073                                             | 0.71073                                             | 0.71073                                                                         | 0.71073                                                                                       |
| Crystal system                                                   | Triclinic                                           | Triclinic                                           | Triclinic                                                                       | Triclinic                                                                                     |
| Space group                                                      | P -1                                                | P -1                                                | P -1                                                                            | P -1                                                                                          |
| Crystal size (mm)                                                | 0.36 × 0.24 × 0.08                                  | 0.23 × 0.19 × 0.08                                  | 0.24 × 0.11 × 0.09                                                              | 0.21 × 0.15 × 0.13                                                                            |
| Unit cell lengths, a, b, c (Å)                                   | 9.3961(10),<br>14.3704(15),<br>18.598(2)            | 7.7108(3),<br>12.7742(4),<br>12.7925(3)             | 12.1381(5),<br>12.9005(5),<br>15.6604 (6)                                       | 11.3428(7),<br>11.6272(8),<br>12.1199(11)                                                     |
| Unit cell angles, α, β, γ (°)                                    | 99.204(5),<br>91.117(5),<br>94.615(5)               | 64.6825(15),<br>74.5158(17),<br>83.476(2)           | 104.149(2),<br>90.794(2),<br>107.642(2)                                         | 65.746(6),<br>76.952(5),<br>80.911(4)                                                         |
| Unit cell volume (Å <sup>3</sup> )                               | 2469.4(3)                                           | 1097.68(3)                                          | 2255.72(9)                                                                      | 1415.89 (13)                                                                                  |
| Z                                                                | 4                                                   | 2                                                   | 1                                                                               | 1                                                                                             |
| T <sub>min</sub> , T <sub>max</sub>                              | 0.83, 0.94                                          | 0.85, 0.93                                          | 0.91, 0.92                                                                      | 0.89, 0.90                                                                                    |
| Calculated density (g cm <sup>-3</sup> )                         | 1.458                                               | 1.555                                               | 1.570                                                                           | 1.444                                                                                         |
| μ (mm <sup>-1</sup> )                                            | 0.77                                                | 0.864                                               | 0.90                                                                            | 0.77                                                                                          |
| F (000)                                                          | 1112                                                | 524                                                 | 1082                                                                            | 626                                                                                           |
| θ range (°)                                                      | 1.110 - 25.533                                      | 1.764 - 27.212                                      | 1.347 - 27.289                                                                  | 1.848 – 25.811                                                                                |
| Completeness to θ <sub>max</sub>                                 | 98.3%                                               | 99.5%                                               | 99.1%                                                                           | 95.9%                                                                                         |
| h, k, l min / h, k, l max                                        | -11, -17, -22 / 11,<br>16, 22                       | -9, -16, -16 / 9, 16,<br>16                         | -15, -16, -20 / 15,<br>16, 20                                                   | -13, -14, -14 / 13,<br>14, 14                                                                 |
| No. of measured, independent, observed [I > 2.0σ(I)] reflections | 32640, 9088, 6480                                   | 18999, 4878, 3692                                   | 62962, 9943, 5792                                                               | 36116, 5232, 3500                                                                             |
| no. of parameters / restraints                                   | 572 / 26                                            | 271 / 0                                             | 568 / 0                                                                         | 343 / 0                                                                                       |
| R <sub>int</sub>                                                 | 0.025                                               | 0.0103                                              | 0.041                                                                           | 0.038                                                                                         |
| Goodness of fit on F <sup>2</sup>                                | 1.0001                                              | 1.0000                                              | 0.9999                                                                          | 1.0000                                                                                        |
| R indices [I > 2σ(I)]                                            | R1 = 0.0386, wR2 = 0.0895                           | R1 = 0.0219, wR2 = 0.0469                           | R1 = 0.0451, wR2 = 0.0786                                                       | R1 = 0.0537, wR2 = 0.1469                                                                     |
| R indices (all data)                                             | R1 = 0.0624, wR2 = 0.0988                           | R1 = 0.0370, wR2 = 0.0500                           | R1 = 0.0969, wR2 = 0.0834                                                       | R1 = 0.0882, wR2 = 0.1646                                                                     |

Figure S3. 11a  $d_6$ -DMSO adduct

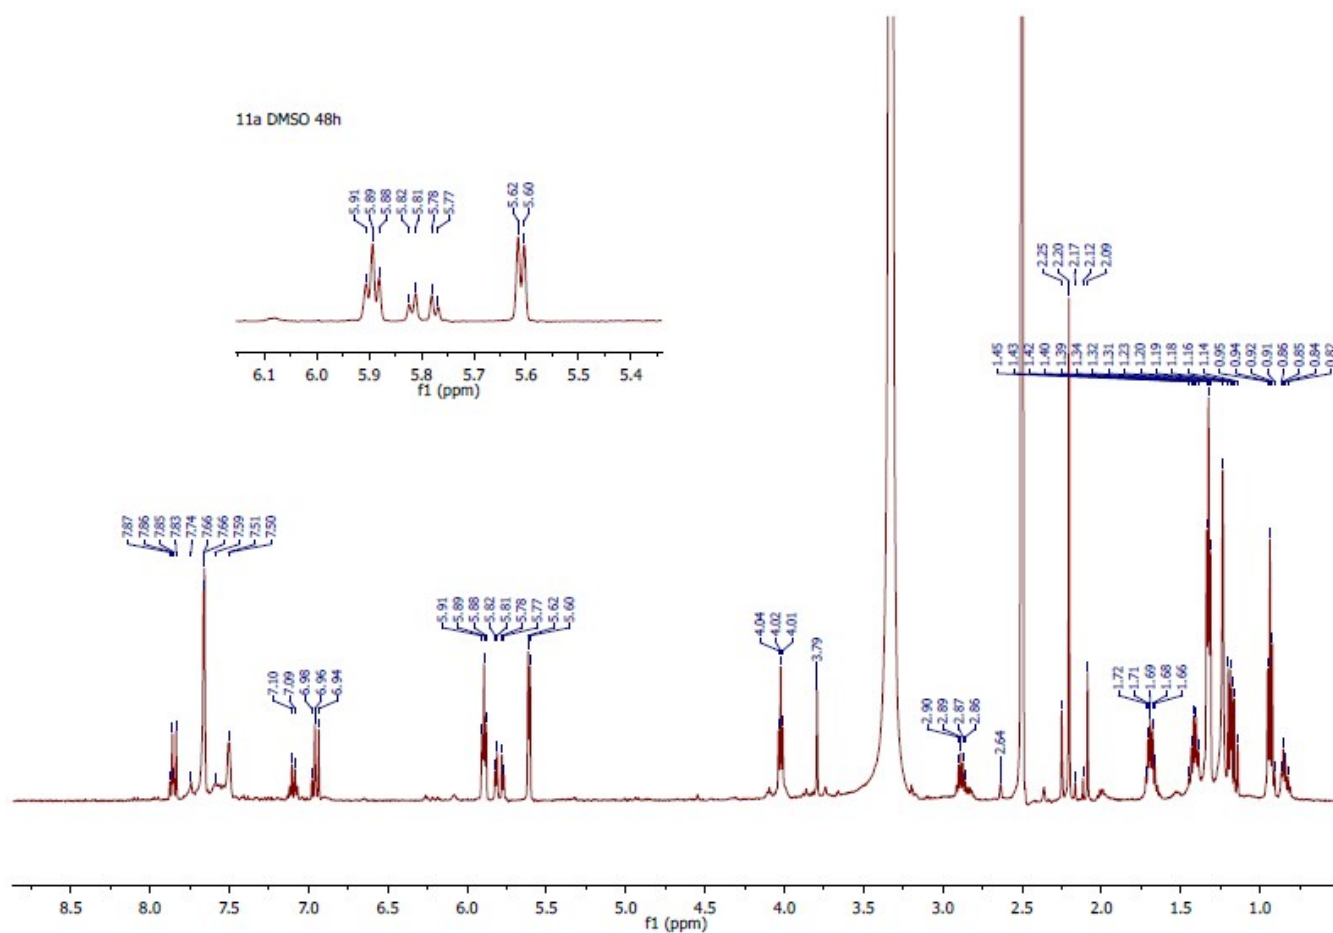

Figure S4. ESI-MS analysis-Hydrolysis studies

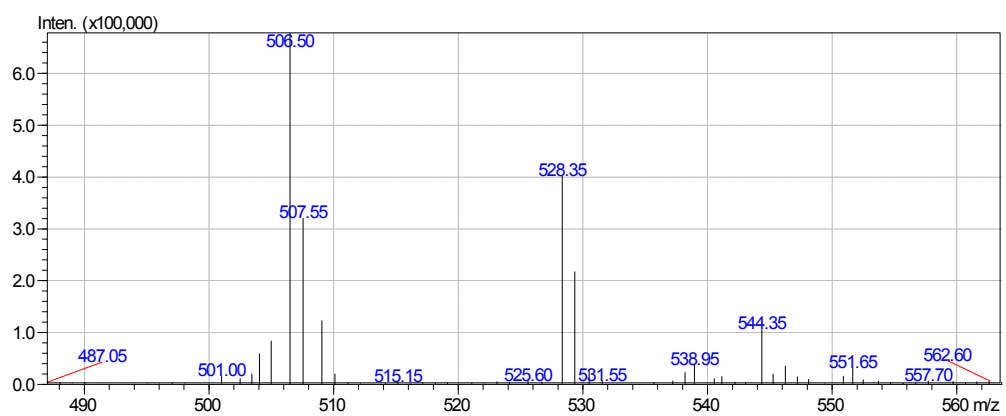

$[M-Cl]^+ = 507.5$

$[M-Cl+H_2O]^+ = 525.5$

**Figure S5.** ESI-MS analysis-Formation of histidine adduct peaks

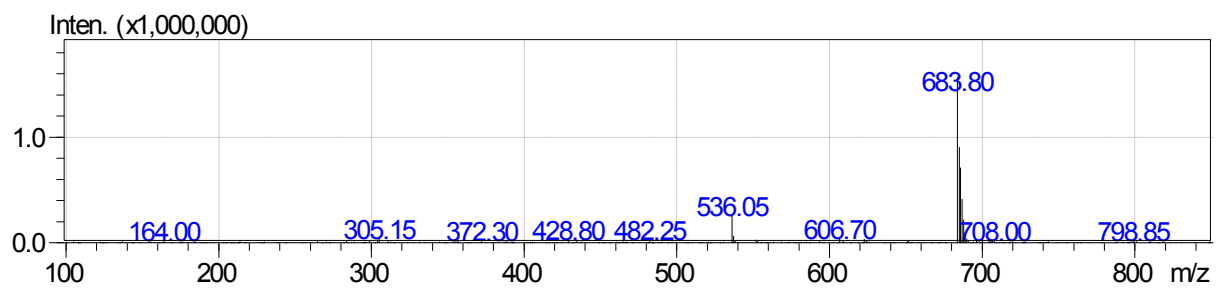

$[M-Cl + His+Na]^+ = 683.8$

# Compound 11a

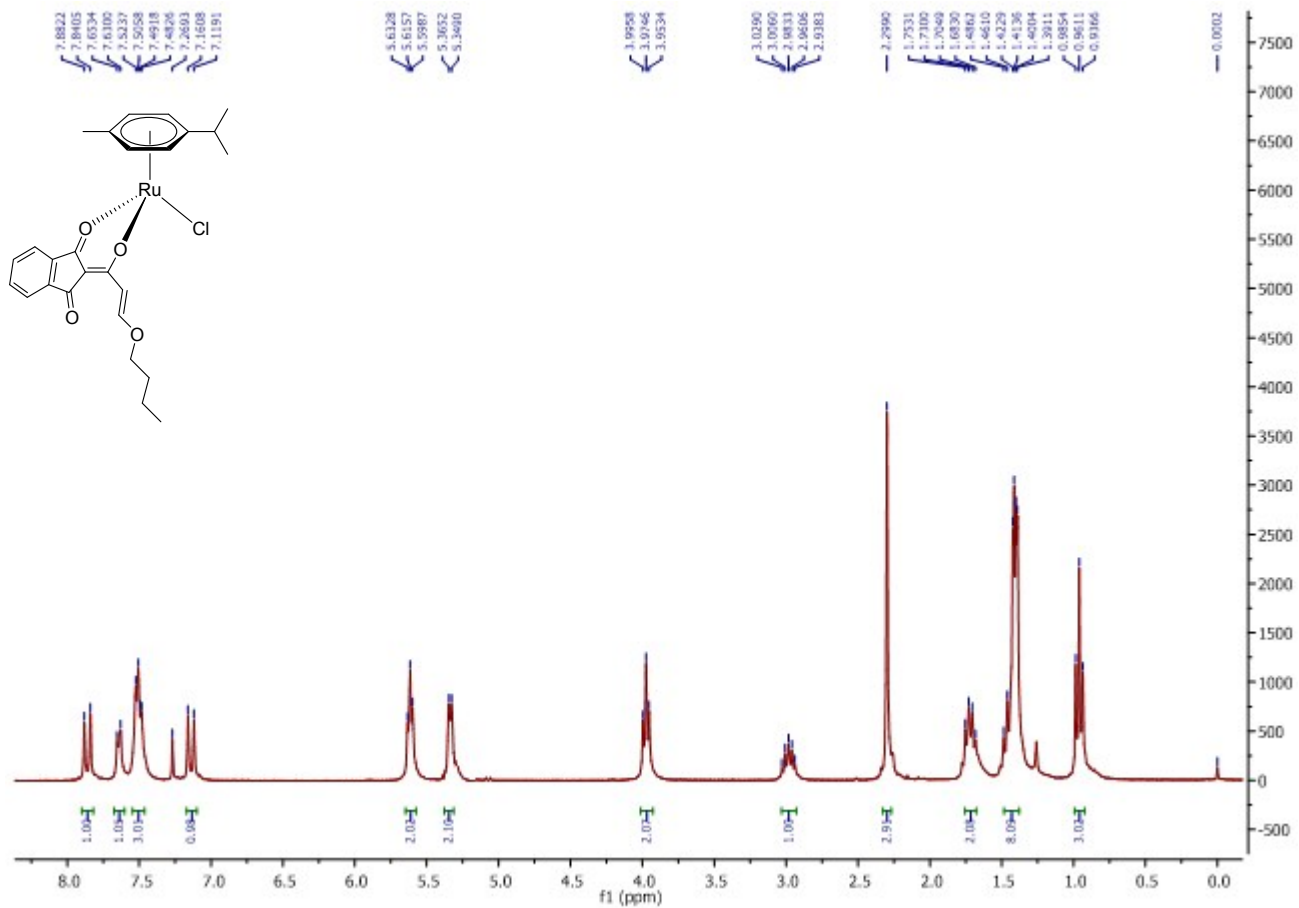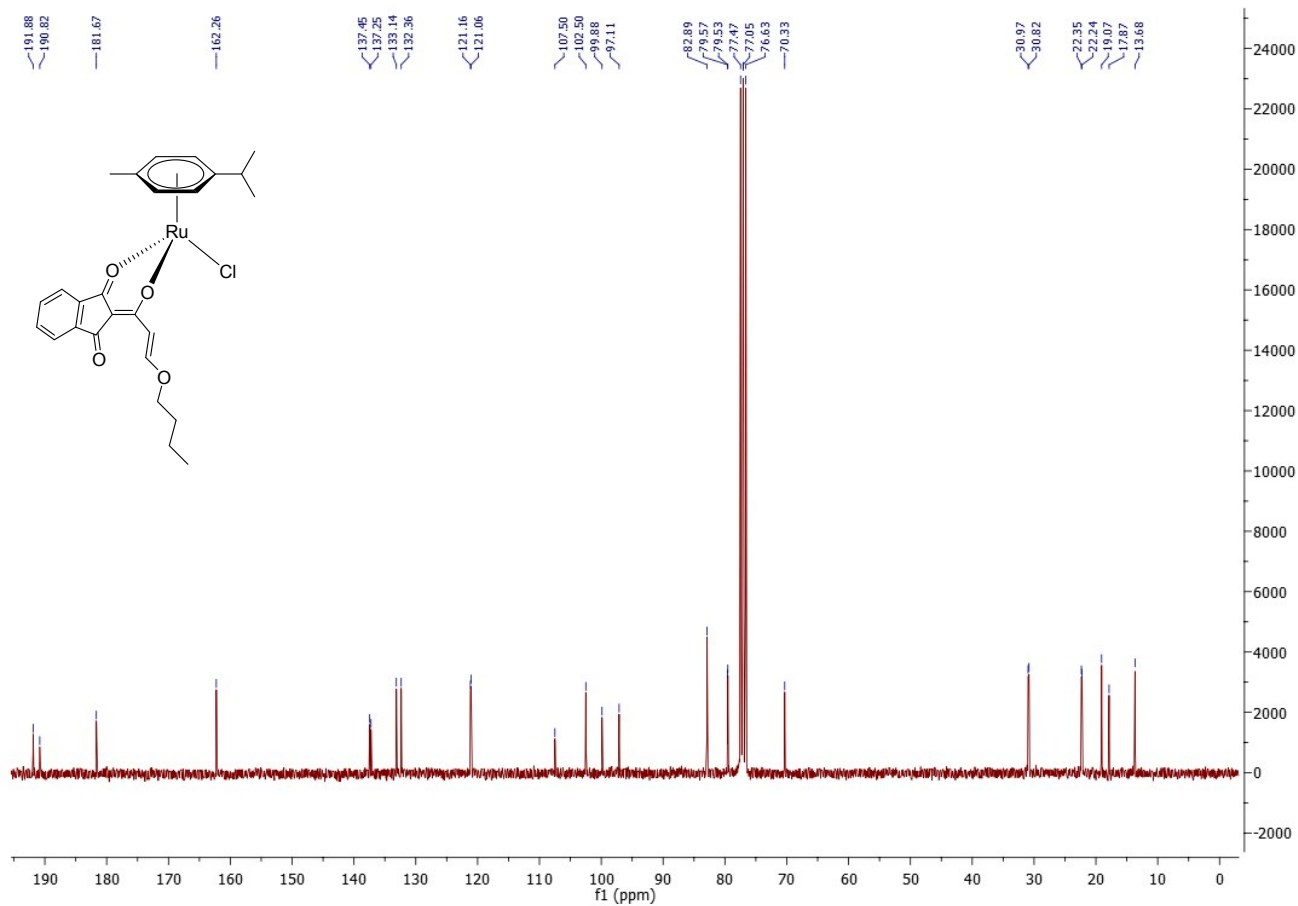

# Compound 11b

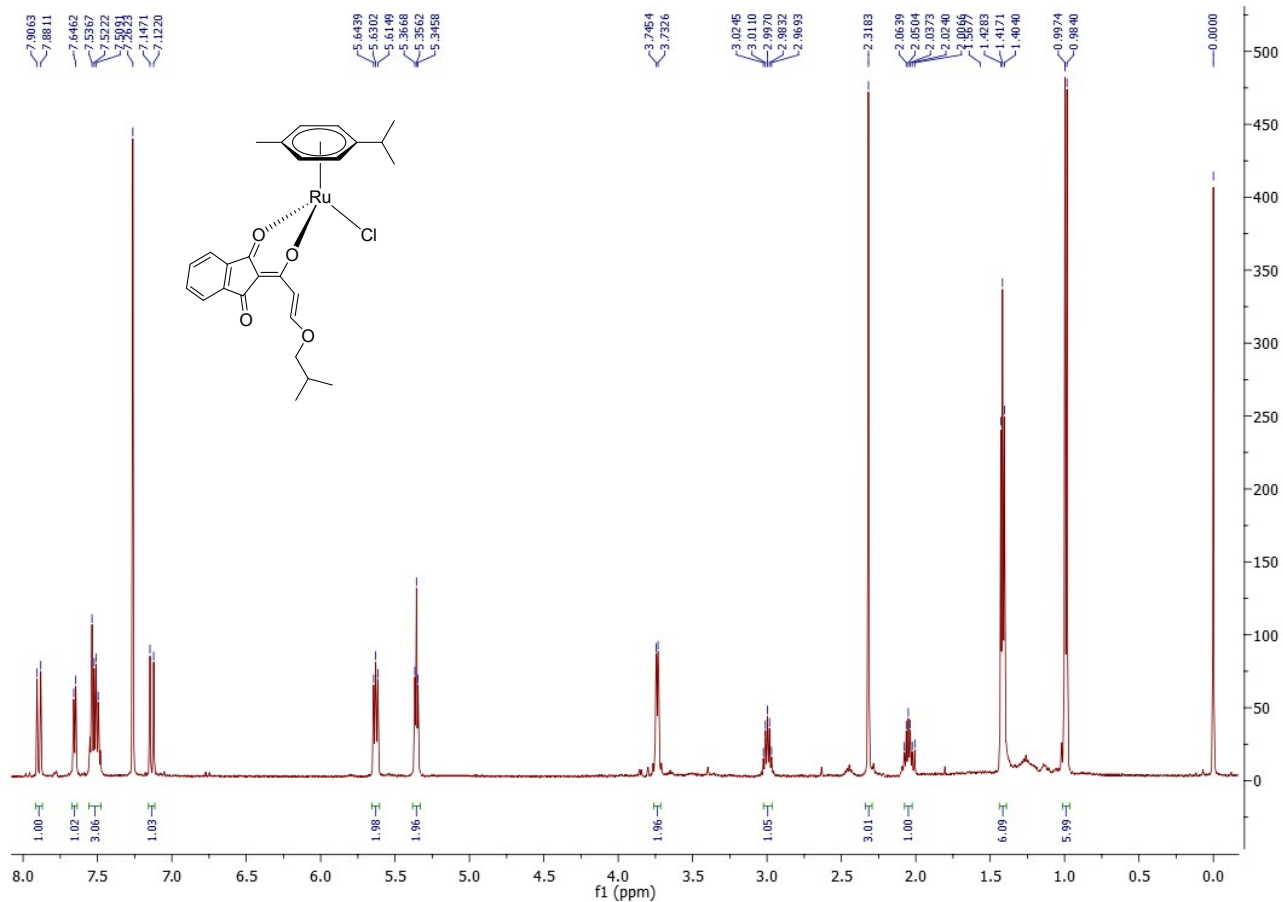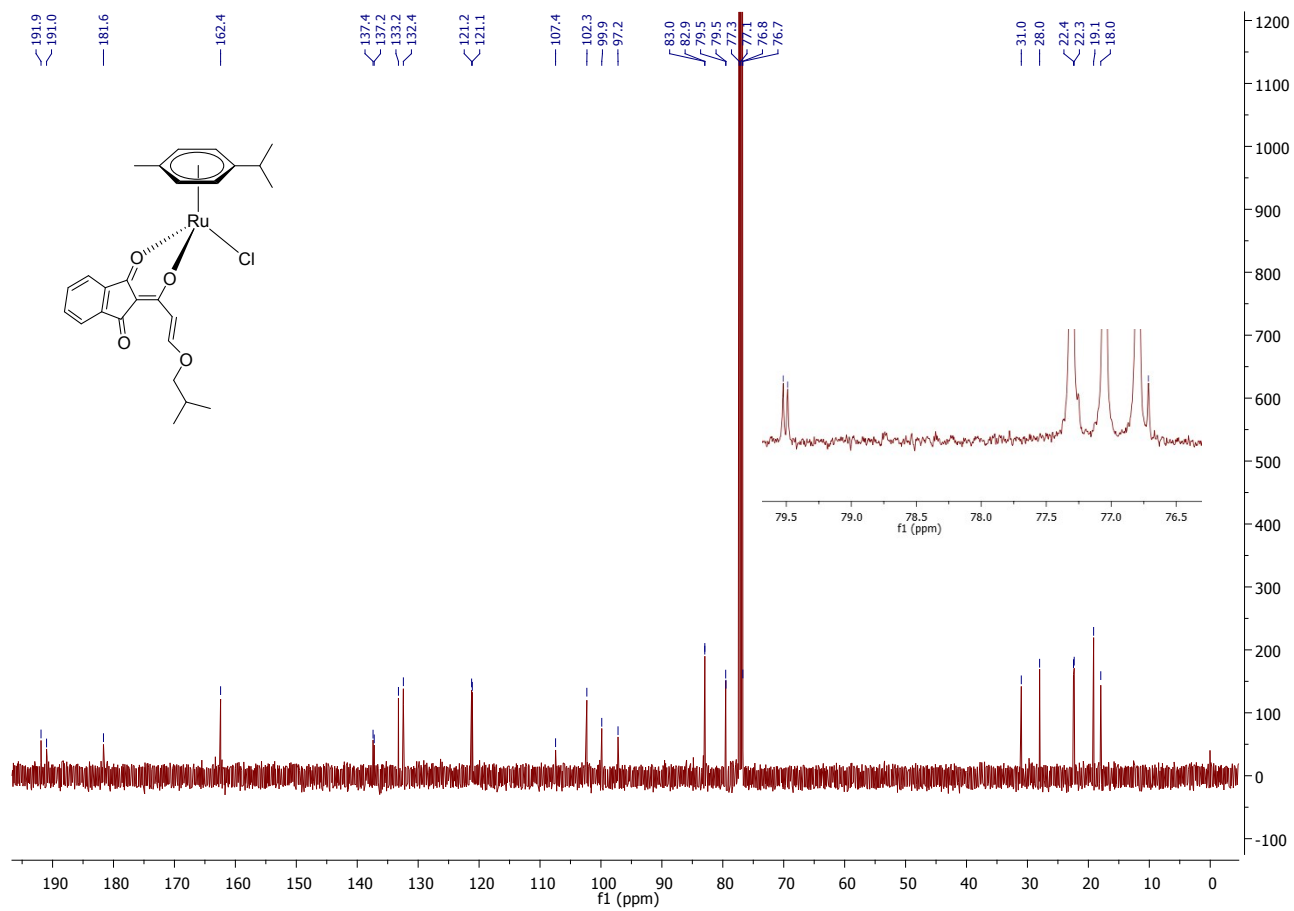



# Compound 11c

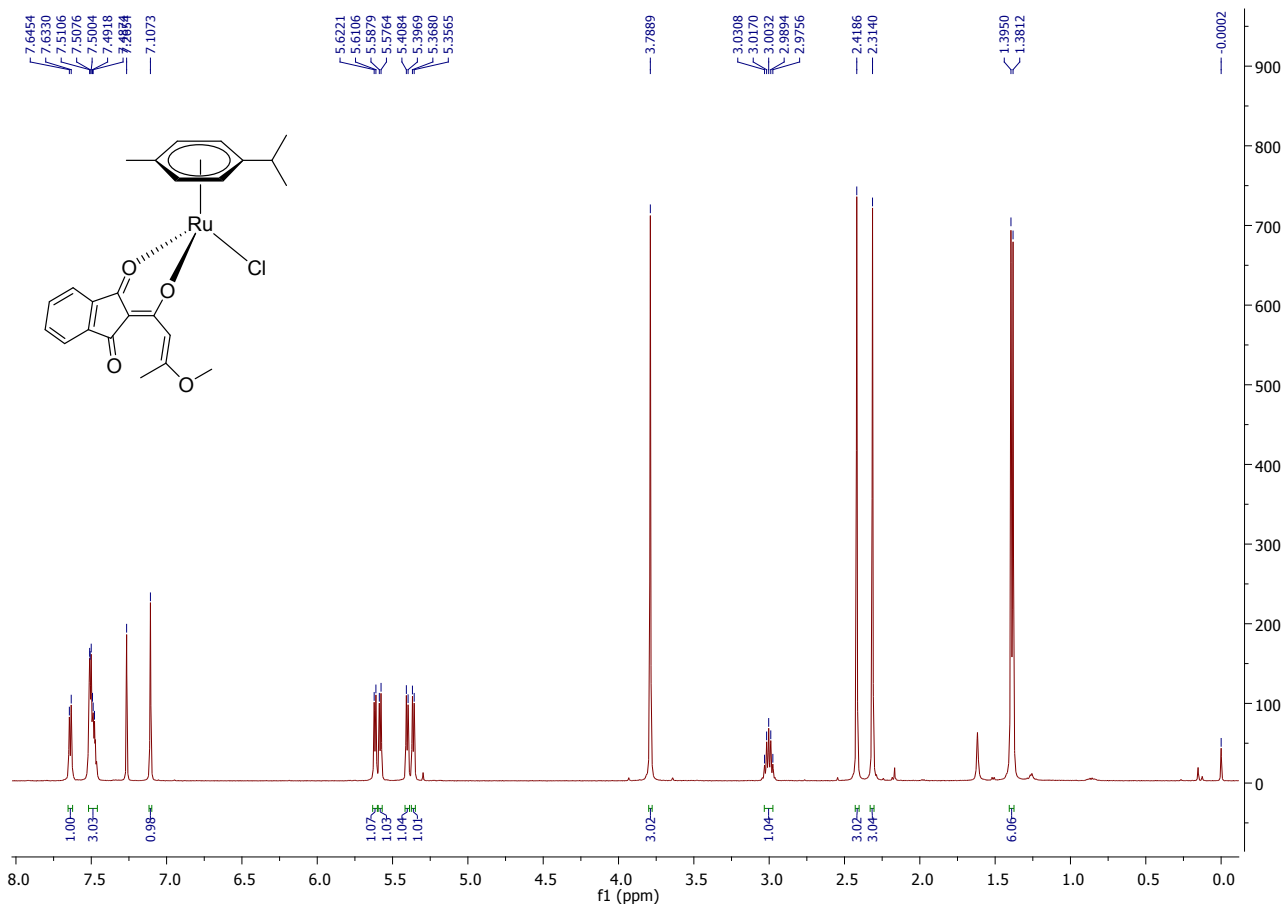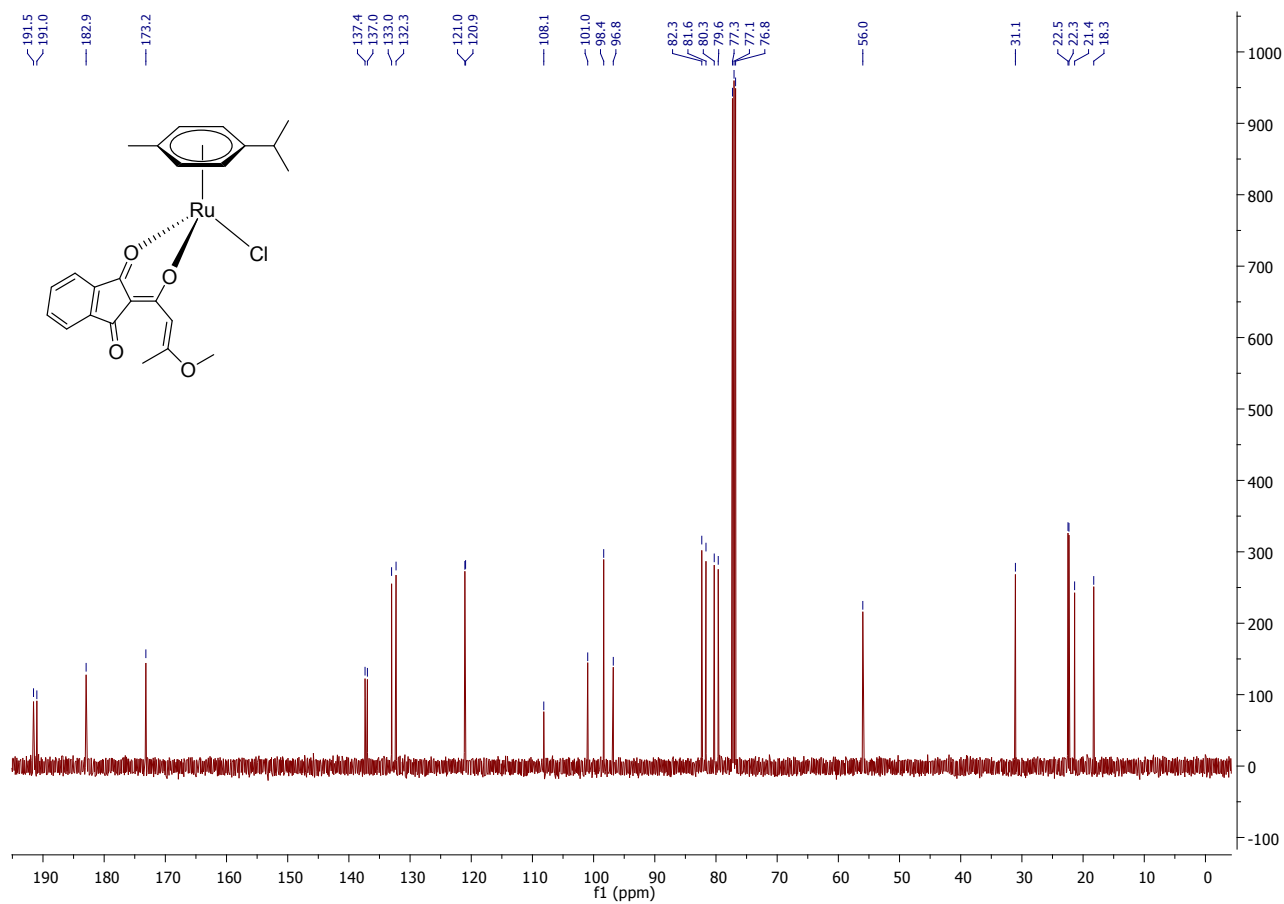

# Compound 11d

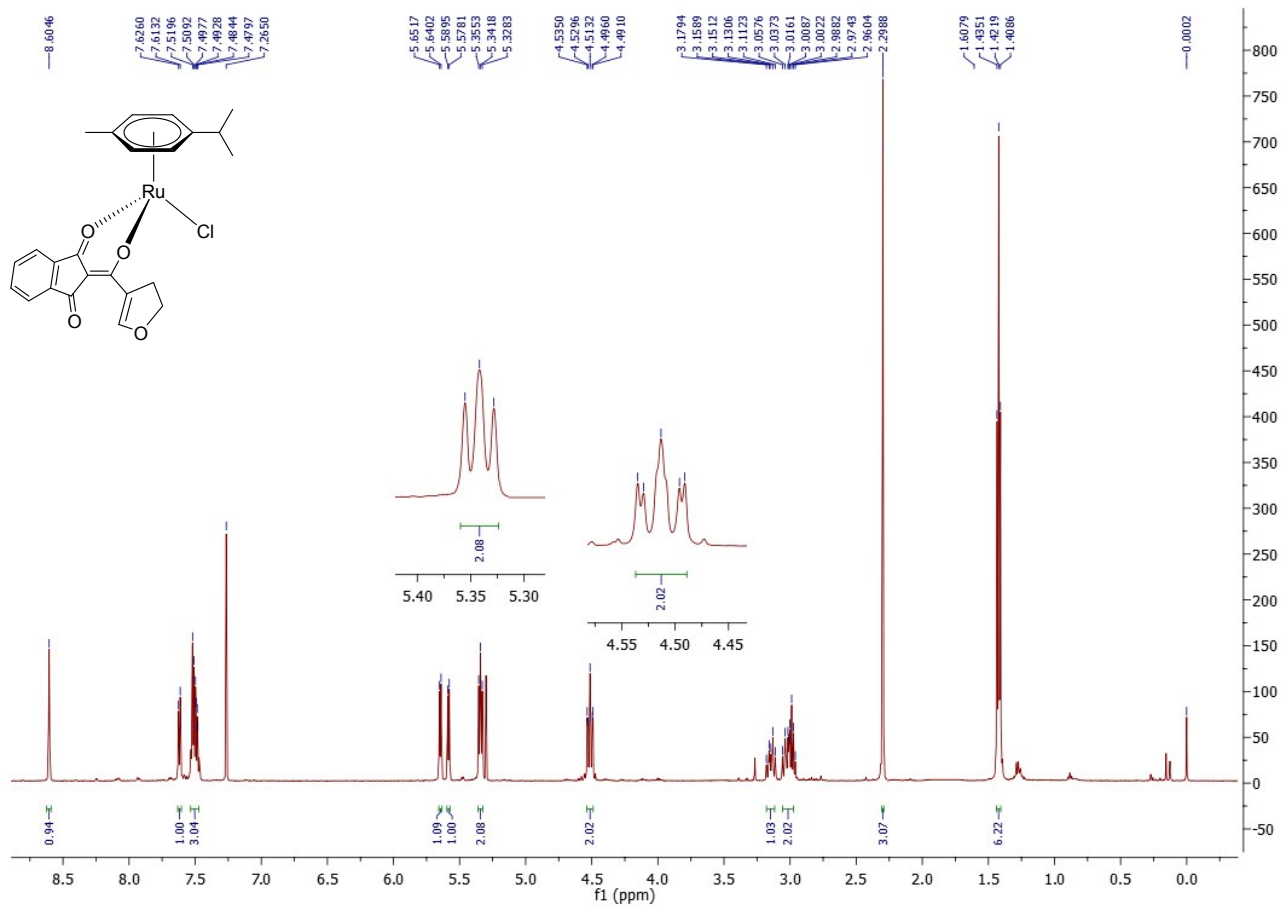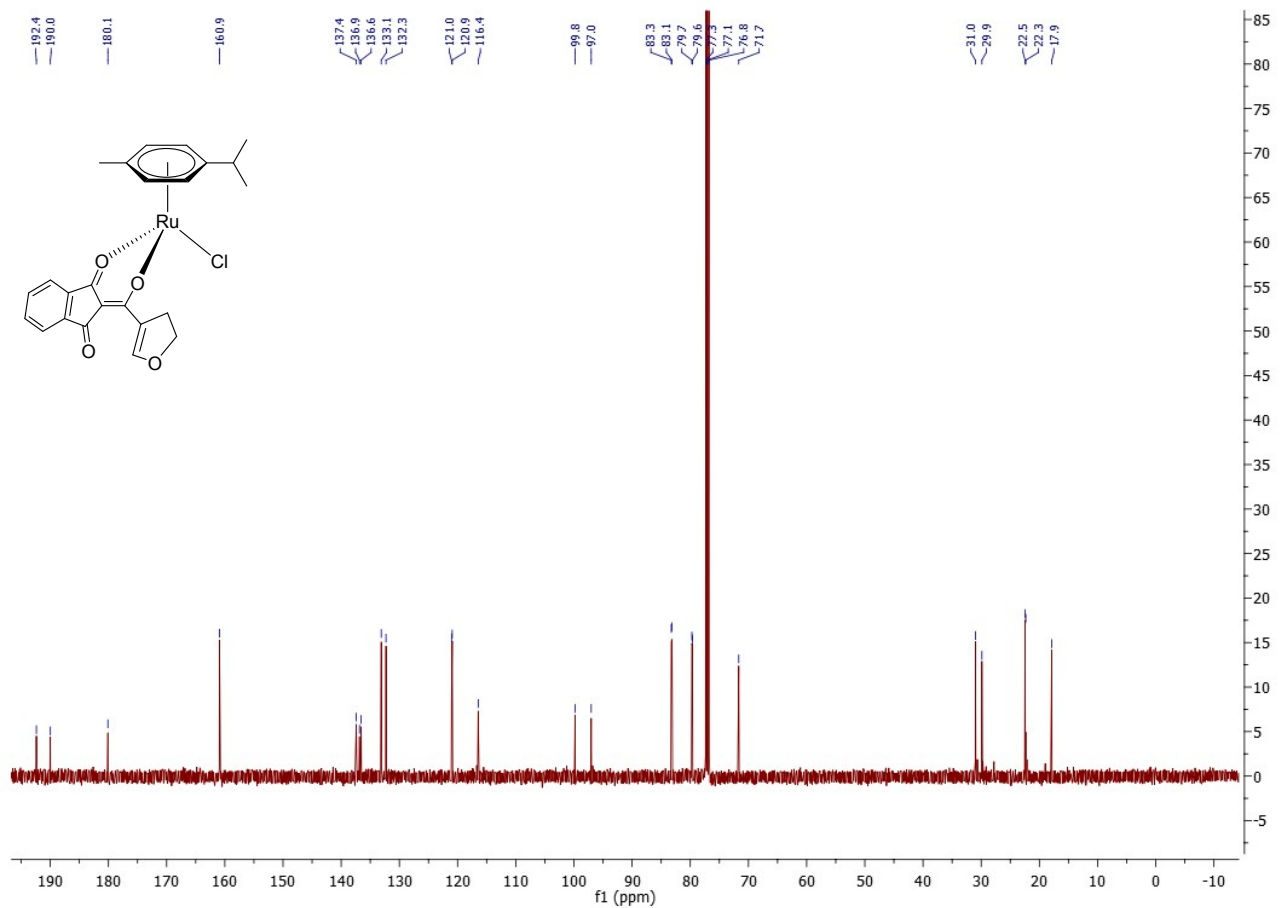

# Compound 11e

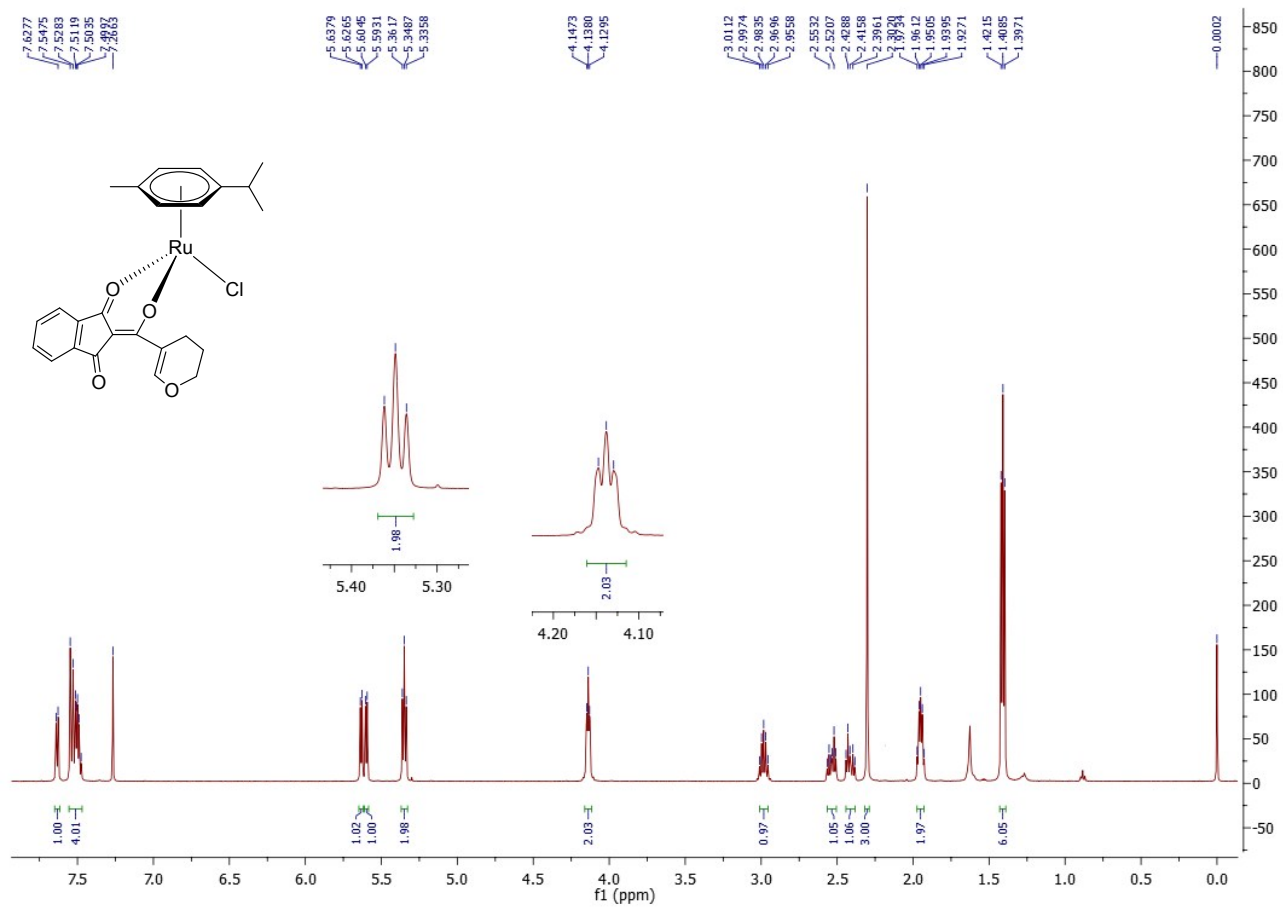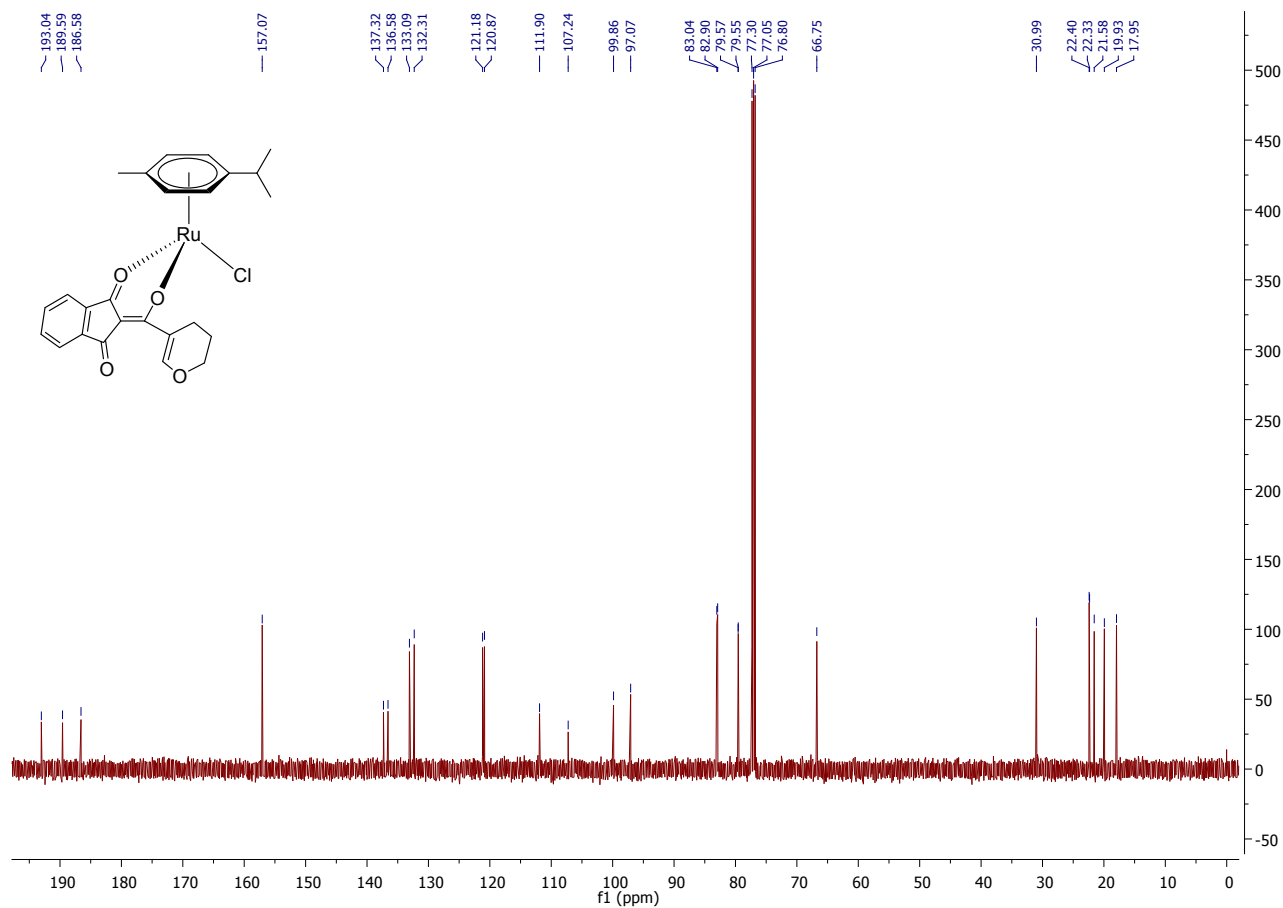

# Compound 12

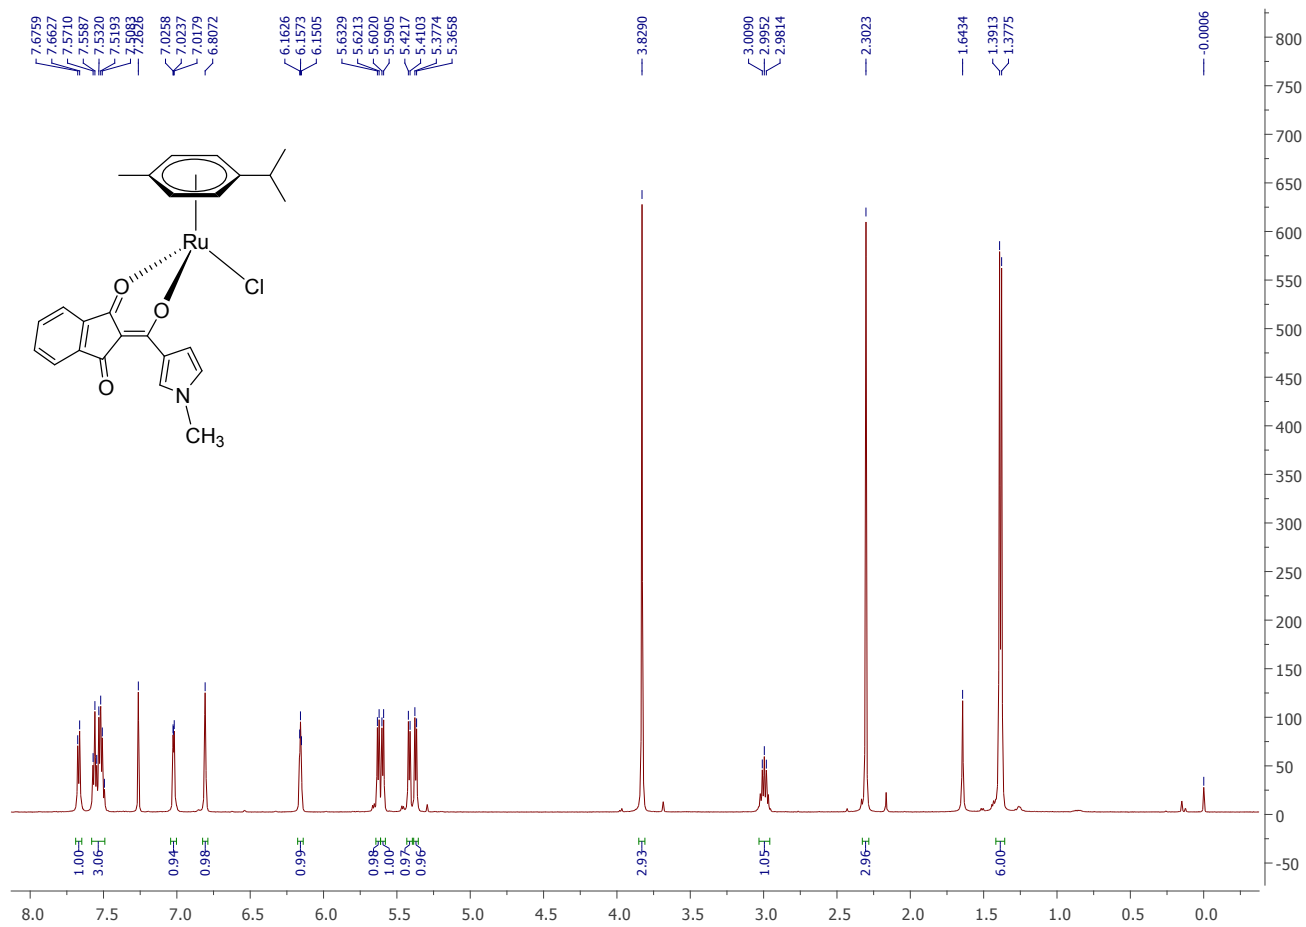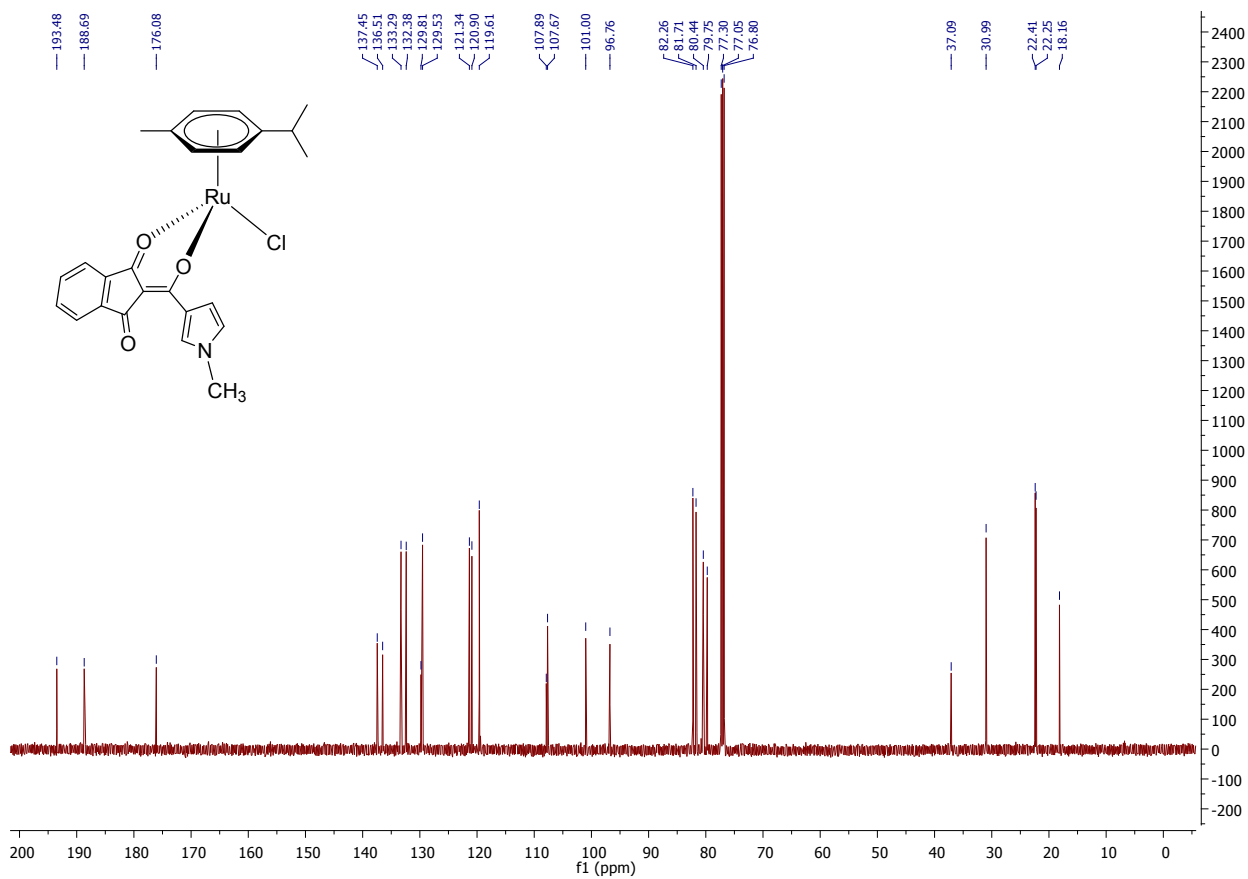

# Compound 13a

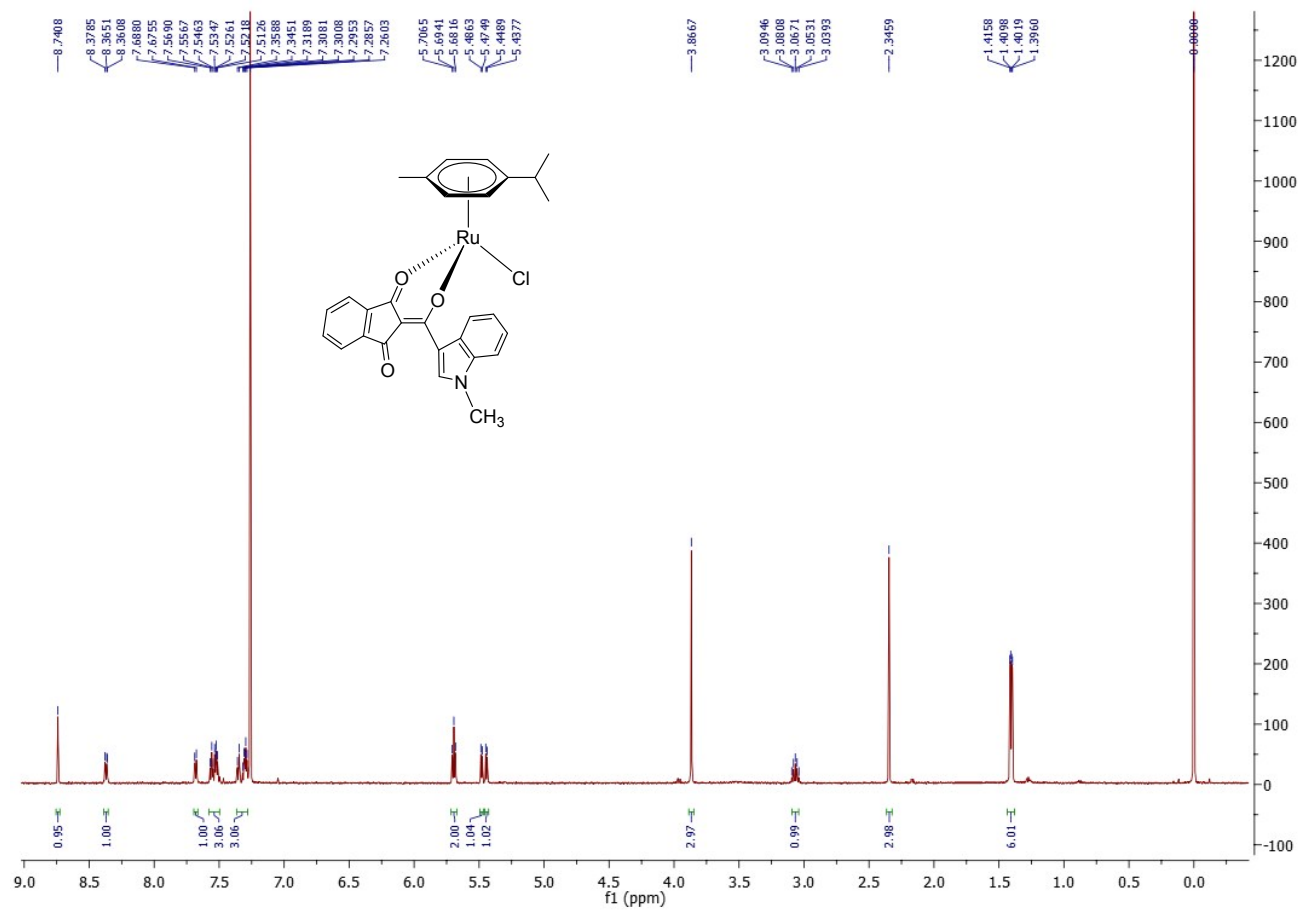

# Compound 13b

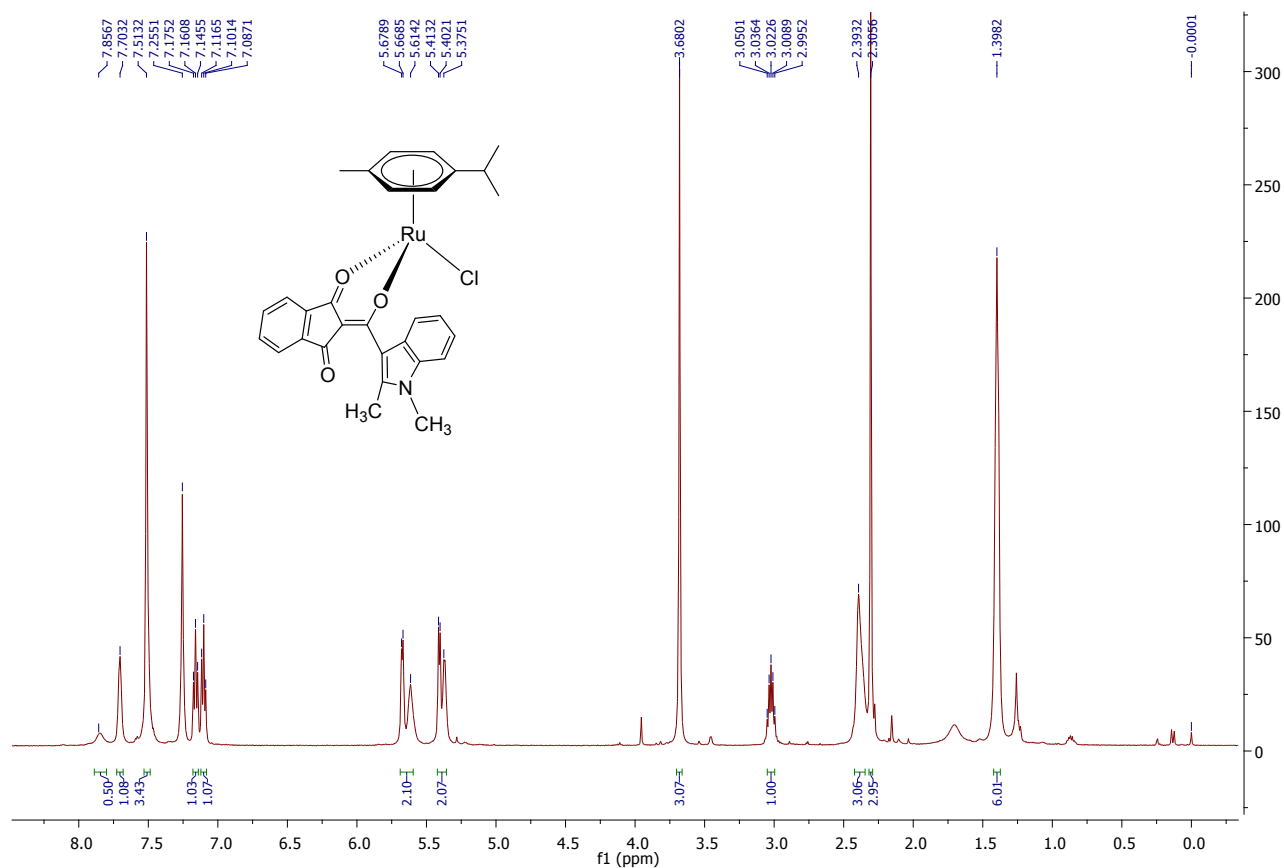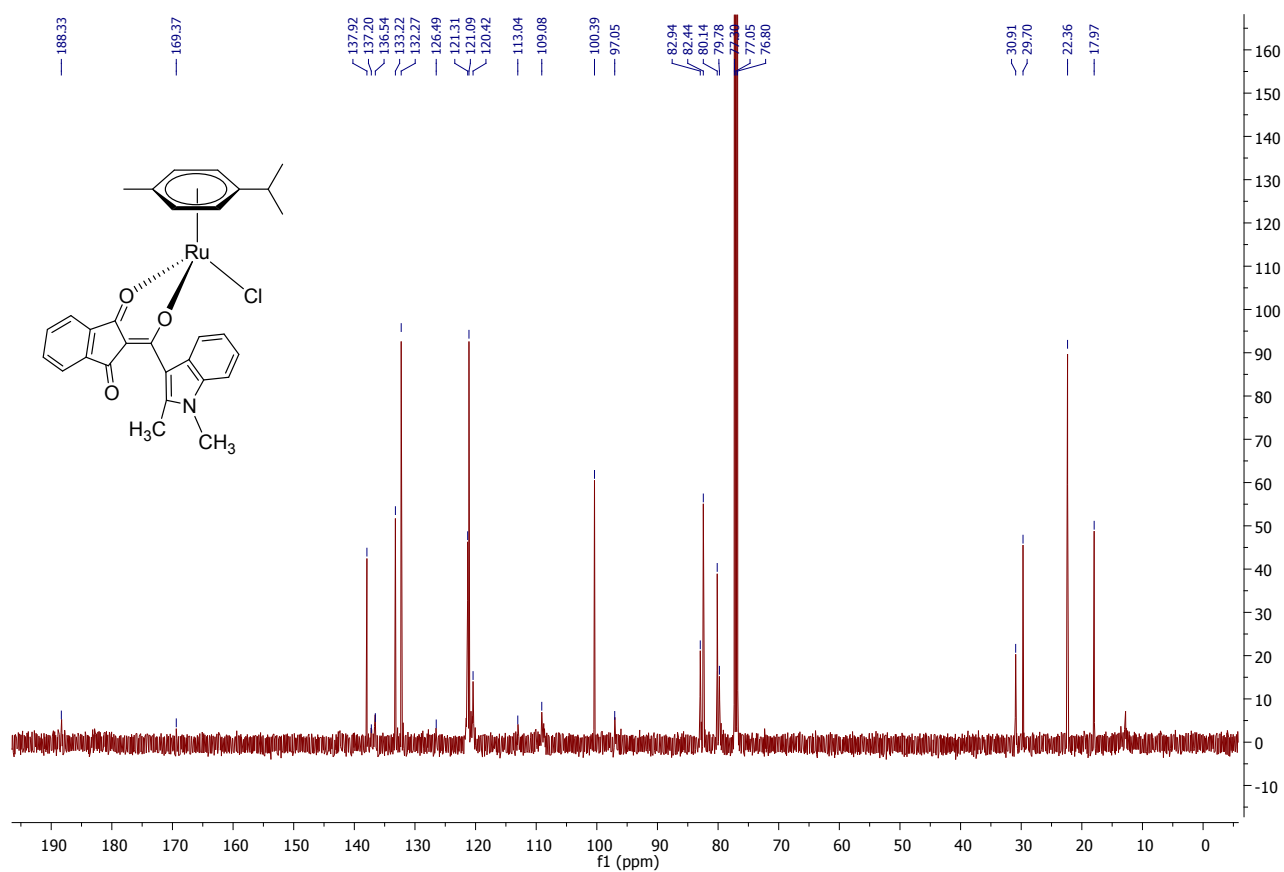

Supplement: c7nj02162c1.pdf [file c7nj02162c1.pdf]
